# Supplementary material for: Detection of Quantitative Trait Loci Controlling the Content of Phenolic Compounds in an Asian Plum (Prunus salicina L.) F1 Population
Source: Front Plant Sci. 2021 Jul 9;12:679059. doi: 10.3389/fpls.2021.679059 (PMC8299277; doi:10.3389/fpls.2021.679059)
Supplement: Supplementary file 2 [file Data_Sheet_1.xlsx]

## Sheet: Suppl.T1 - Traits
Trait type	Trait name	Number of individuals		Total number of samples analyzed		Trait abbreviation
		T1	T2	T1	T2
Phenol content-HPLC-DAD	Compound D	85	85	510	510	CompD
	Compound E	85	85	510	510	CompE
	Compound F	85	85	510	510	CompF
	Compound T	85	85	510	510	CompT
	Compound L	85	85	510	510	CompL
	Compound R	85	85	510	510	CompR
	Cyanidin-3-Glucoside	85	85	510	510	C3G
	Cyanidin-3-Rutinoside	85	85	510	510	C3R
	Compound P	85	85	510	510	CompP
	Compound M	85	85	510	510	CompM
	Compound U	85	85	510	510	CompU
	Total anthocyanins	85	85	510	510	Ant
Phenol content-spectrophotometric test	Total flavonoids	92	80	552	480	Flv
	Total phenols	92	80	552	480	Phe
	Total procyanidins	92	80	552	480	Pca
	Antioxidant activity DPPH	92	80	552	480	Dpph
	Antioxidant activity FRAP	92	80	552	480	Frap
Fruit quality	Ripening Time	92	80	552	480	RT.JD
	Fruit Development Period	92	80	552	480	FDP
	Overcolour	92	80	552	480	Ovc
	Weight	92	80	552	480	Wt
	Chlorophyll absorbance index	92	80	552	480	IAD1
	Soluble Solid Content	92	80	552	480	SSC
	pH	92	80	552	480	pH
	Acidity	92	80	552	480	Acidity
	Color	92	80	552	480	Color
	Color L	92	80	552	480	Color.L
	Color a	92	80	552	480	Color.a
	Color b	92	80	552	480	Color.b
	C	92	80	552	480	C
	Color H	92	80	552	480	Color.H
Supplementary Table 1. Table of phenotypic traits, seasons and individuals included in this study. Phenolic compounds and fruit quality traits were analyzed in two seasons (2015-2016, T1; 2016-2017, T2). The number of available individuals and the number of samples analyzed for each season are indicated. Mesocarp (flesh) and exocarp (skin) tissue samples were analyzed for each trait. The traits R…

## Sheet: Suppl.T2 - calibration curves
Trait	Standard compound	Season	Standard concentration range (µg/ml)	Slope	Intercept	R2	p-value
Total phenols	Gallic acid	T1	0 - 400	0.0041	0.0522	0.9926	< 2,2e-16
		T2	0 - 600	0.0033	0.096	0.9866	< 2,2e-16
Total flavonoids	Catechin	T1	0 - 600	0.001	0.001	0.99	< 2,2e-16
		T2	0 - 600	0.001	-0.013	0.9807	< 2,2e-16
Total procyanidins	Catechin	T1	0 - 40	0.0284	0.0168	0.9703	< 2,2e-16
		T2	0 - 50	0.0181	0.0218	0.9886	< 2,2e-16
DPPH	Trolox	T1	0 - 35	-0.0057	-0.2113	0.9501	< 2,2e-16
		T2	0 - 35	-0.0067	-0.1199	0.9604	< 2,2e-16
FRAP	FeSO4	T1	0 - 1000	0.0005	-0.0027	0.9937	< 2,2e-16
		T2	0 - 1000	0.0005	0.059	0.9854	< 2,2e-16
C3G	C3G	T1	0 - 100	33076	158.1	0.9949	< 2,2e-16
C3R	C3R	T1	0 - 100	17837	103.64	0.9938	< 2,2e-16
Supplementary Table 2. Concentration ranges and main parameters of standard calibration curves used for spectrophotometric and HPLC determination of PCC traits. The p-value is presented for each determination coefficient (R2), indicating its significance.

## Sheet: Suppl.T3 - MLM flesh
Trait	Fixed variable	Random variables	Variance	Residual percentage (%)	Fit value (AIC)
Total phenols	FTR	Weight	37113	2.82245	5339.33
		Accesion	83965
		RT.JD	56934
		year	494168
		Residual	19523
Total flavonoids	FTR	Accesion:year	1292.1	23.7611	4514.63
		Accesion	1240.6
		year	74.9
		Residual	812.7
Total procyanidins	FTR	Accesion:year	21036	11.2094	5808.23
		Accesion	2121
		year	51547
		Residual	9431
DPPH	FTR	Weight	18531	8.69433	5526.5
		Accesion	53045
		RT.JD	23723
		year	393505
		Residual	46545
FRAP	FTR	Accesion	2964335	57.4936	9662.78
		year	28507165
		Residual	42567940
C3G	FTR	Accesion:year	4.231	73.263	4176.15
		Accesion	48.911
		year	1.748
		Residual	150.406
C3R	FTR	Accesion	76.072	80.7157	4604.81
		year	8.874
		Residual	355.548
Compound D	FTR	Accesion	0.000275	46.0814	-1405.4
		year	0.0001587
		Residual	0.00037066
Compound E	FTR	Accesion:year	0.0003054	76.9974	-934
		Accesion	0.0022316
		Residual	0.0084922
Compound F	FTR	Accesion	3.946e-05	92.1716	-2487.87
		Residual	0.0004646
Compound T	FTR	Accesion	0.0007109	70.7304	-1772.27
		Residual	0.0017179
Compound L	FTR	Accesion	0.0003179	90.068	-1477.68
		year	3.387e-05
		Residual	0.00319
Compound R	FTR	Accesion:year	0.0001354	49.4119	-2586.12
		Accesion	0.0001958
		year	0
		Residual	0.0003235
Compound P	FTR	Accesion	9.888e-05	96.1369	-1501.35
		year	2.794e-05
		Residual	0.003156
Compound M	FTR	Accesion	0.0164843	89.2235	501.89
		year	0.0004685
		Residual	0.14036
Compound U	FTR	Accesion	0.0004556	95.1103	-909.65
		year	4.308e-05
		Residual	0.0097
Supplementary Table 3. Fixed and random variables, variance, heritability and adjustment value for linear mixed models of characters associated with phenolic compounds in mesocarp. The linear mixed models selected for each character in mesocarp are presented together with the variance of each random variable. Genetic heritability and residual are expressed as a percentage. For the selection of th…

## Sheet: Suppl.T4 - MLM skin
Trait	Fixed variable	Random variables	Variance	Residual percentage (%)	Fit value (AIC)
Total phenols	FTR	Weight	1660143	0.0208745	4407.48
		Accesion	1063217
		year	5174588
		Residual	1649
Total flavonoids	FTR	Accesion:year	72504	32.4518	6468.58
		Accesion	57299
		year	8791
		Residual	66584
Total procyanidins	FTR	Accesion:year	354440	15.5072	7229.44
		Accesion	98010
		year	743609
		Residual	219516
DPPH	FTR	Accesion	446431	15.2965	7722.27
		year	3611130
		Residual	732752
FRAP	FTR	Accesion:year	74605697	15.4254	9981.97
		Accesion	12429247
		year	358925385
		Residual	81337758
C3G	FTR	Weight	1180.41	1.13401	3602.99
		Accesion:year	3019.89
		Accesion	2056.35
		year	219.25
		Residual	74.28
C3R	FTR	Accesion:year	3063.3	36.7658	5950.72
		Accesion	3460.7
		year	306.5
		Residual	3971.4
Comp D	FTR	Accesion:year	0.03443	26.8454	-339.97
		Accesion	0.01462
		year	0.01289
		Residual	0.02273
Comp E	FTR	Accesion:year	0.02944	50.1249	143.77
		Accesion	0.03021
		year	6.091e-05
		Residual	0.06001
Comp F	FTR	Accesion	0.0004028	80.777	1739.33
		year	4.293e-05
		Residual	0.001873
Comp T	FTR	Accesion	0.013431	62.4451	-179.26
		year	0.008474
		Residual	0.036423
Comp L	FTR	Accesion	0.007932	82.7633	-78.9
		year	0.001543
		Residual	0.045495
Comp R	FTR	Accesion:year	0.03097	44.2672	-272.19
		Accesion	0.00223
		year	5.805e-11
		Residual	0.02637
Comp P	FTR	Accesion	0.02168	78.5288	304.05
		year	0.00389
		Residual	0.09352
Comp M	FTR	Weight	0.234288	0.515703	-229.46
		Accesion:year	0.859427
		Accesion	0.113668
		year	0.062157
		Residual	0.006581
Comp U	FTR	Accesion	1.1275	66.8892	2180.21
		year	0.5342
		Residual	3.3569
Supplementary Table 4. Fixed and random variables, variance, heritability and adjustment value for linear mixed models of characters associated with phenolic compounds in exocarp. It presents the same description as Table 2.

## Sheet: Suppl.T5 - QTL specifications
Trait	Parent	Tissue	LG	LOD peak	SNP genotypes		Position (cM)	QTL interval	LOD threshold	QTL LOD	PEV (%)	Additive effect	KW
				marker	98.99	Ang		(cM)
Total phenols	'98.99'	Flesh	3	3_02695739	CG	CG	7509	5.62 - 8.51	2.8	3.77	20.4	-16.955	14127
Total flavonoids	'98.99'	Flesh	7	7_14683927	TC	TT	28.98	28.98 – 31.87	2.7	3.22	14.2	-10.279	15419
			8	8_18107776	GA	AG	58012	57.39 – 58.01		3.01	13.1	9.645	14388
		Skin	8	8_16024758	AG	AG	41636	40.75 – 43.64	2.7	3.17	16.1	68.341	12878
	'Angeleno'	Flesh	5	5_10866620	AC	CA	29955	29.33 – 29.96	2.7	5.69	27.1	16.458	16433
Total procyanidins	'Angeleno'	Flesh	5	5_05188952	TA	AT	20599	19.35 – 21.56	2.7	5.03	20.1	7.946	11691
			8	8_02960820	GG	GA	4356	3.74 – 5.36		4.45	17.5	6.793	17959
DPPH	'Angeleno'	Flesh	8	8_02960820	GG	GA	4356	3.74 – 4.36	2.7	2.79	15.5	77.849	10267
C3G	'98.99'	Skin	4	4_07429482	CG	CC	33914	32.66 – 34.91	2.8	5.12	26.7	-16.889	22.31
C3R	'98.99'	Skin	4	4_06220253	TC	CC	25769	23.88 – 26.77	2.4	4.35	21	-20.547	19757
Comp D	'Angeleno'	Skin	3	3_07486878	GC	CG	27726	22.69 – 27.73	2.8	5.47	23.2	-0.159	8484
Comp E	'98.99'	Skin	4	4_06577345	CA	CC	28906	27.02 – 29.91	2.6	4.24	20.5	-0.058	20287
Comp F	'98.99'	Skin	4	4_06220253	TC	CC	25769	25.77 – 26.77	2.3	2.92	14.6	-0.006	10188
Comp T	'98.99'	Skin	4	4_06220253	TC	CC	25769	23.88 – 26.77	2.4	4.88	20.6	-0.044	14954
			7	7_18439580	CT	TC	55485	54.86 – 56.49		3.68	15	-0.038	9601
Comp L	'98.99'	Flesh	1	1_03223529	GC	CC	7501	6.26 – 8.50	2.3	4.29	15.8	-0.017	2545
		Skin	4	4_07594839	GC	CG	35164	34.91 – 36.16	2.3	4.58	18.3	-0.129	22444
	'Angeleno'	Skin	3	3_00246196	AA	GA	0.621	0 – 1.62	2.5	2.85	12.4	-0.024	4848
Comp R	'Angeleno'	Skin	4	4_10742408	AG	GA	36398	35.78 – 37.40	2.7	3.21	16	0.006	19917
Comp P	'Angeleno'	Skin	3	3_00246196	AA	GA	0.621	0 – 1.62	2.3	3.25	16.2	-0.049	12812
Comp M	'98.99'	Skin	4	4_11045830	GA	GG	42052	41.43 – 43.05	2.7	2.77	15.5	-0.056	10272
Color	'98.99'	Skin	4	4_11045830	GA	GG	42052	41.43 – 43.05	2.7	3.57	2021-05-19	-0.367337	15029
	'Angeleno'	Skin	3	3_17781392	GT	TG	47451	42.21 - 49.45	2021-06-02	3.86	2021-01-17	-0.35493	20151
Color.a	'98.99'	Flesh	3	3_27140591	GT	TG	89894	88.64 - 90.51	2021-08-02	4.66	2021-06-24	2.59244	19992
Color.L	'98.99'	Flesh	5	5_17246720	CT	CT	70089	70.08 - 71.33	2021-05-02	2021-08-03	2021-05-20	1.26188	16136
		Skin	4	4_08706957	GA	AA	39567	39.03 - 39.56	2021-05-02	2.65	2021-06-11	7.06771	17700
	'Angeleno'	Skin	3	3_17781392	GT	TG	47451	37.21 - 49.45	2021-07-02	4.63	2021-08-21	2.21215	14333
C	'98.99'	Skin	4	4_13167078	AG	GA	56603	55.71 - 57.60	2021-08-02	3.35	2021-06-18	2.90184	14035
	'Angeleno'	Skin	3	3_17781392	GT	TG	47451	37.21 - 49.45	2021-08-02	8.22	32.5	3.86956	29943
			4	4_10686996	TT	CT	35777	33.24 - 35.77		3.07	2021-03-10	-2.35684	12443
Color.H	'98.99'	Flesh	3	3_27140591	GT	TG	89894	89.89 - 90.51	2021-06-02	3.98	2021-04-21	-5.3636	19992
		Skin	4	4_08706957	GA	AA	39567	37.03 - 39.56	2021-04-02	3.78	2021-07-20	7.60677	19810
	'Angeleno'	Skin	4	4_06466270	AT	TA	21937	20.05 - 21.93	2021-06-02	2021-11-03	2021-04-17	-7.64545	10166
Supplementary Table 5. QTLs detected in 99xang progeny by Multiple Mapping of QTLs (MQM) and Kruskal Wallis (KW) analysis. Summary of QTLs related to phenolic compounds present in the linkage groups (LG) of both parents. The position and marker associated with each QTL detected are indicated by the MQM parametric analysis (LOD value and PEV, the phenotypic variance explained by the QTL), the alle…
